# Supplementary material for: circINSR Inhibits Adipogenic Differentiation of Adipose-Derived Stromal Vascular Fractions through the miR-152/MEOX2 Axis in Sheep
Source: MDPI journal article supplement (doi:10.3390/ijms24043501), 2023-02-09
Supplement: s1 [file s1]

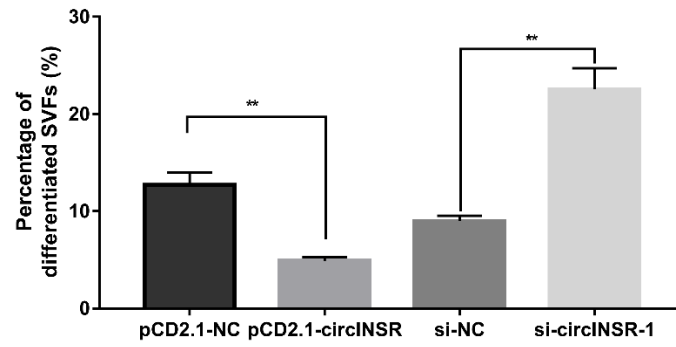

**Figure S1.** The percentage of differentiated SVFs containing lipid droplets that overexpress or interfere with circINSR.

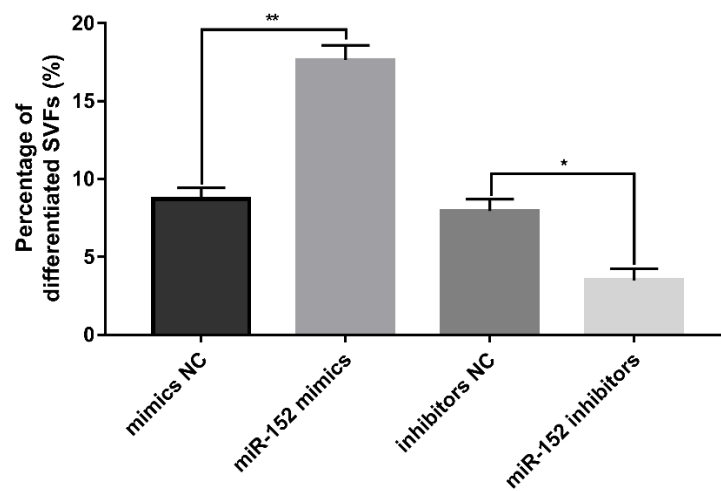

**Figure S2.** The percentage of differentiated SVFs containing lipid droplets that overexpress or inhibit miR-152.

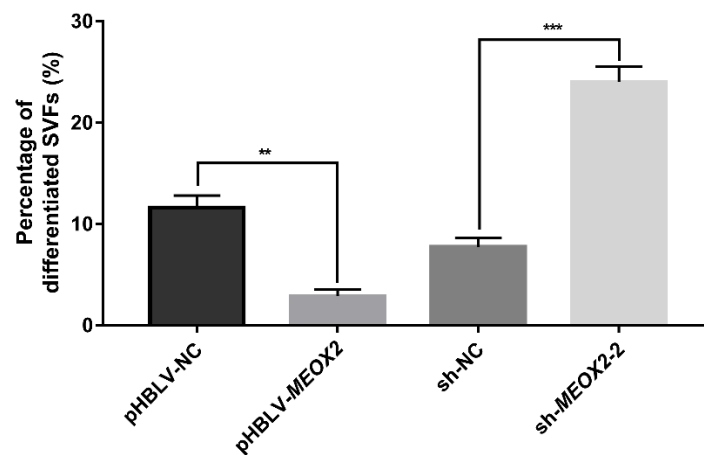

**Figure S3.** The percentage of differentiated SVFs containing lipid droplets that overexpress or interfere with *MEOX2*.

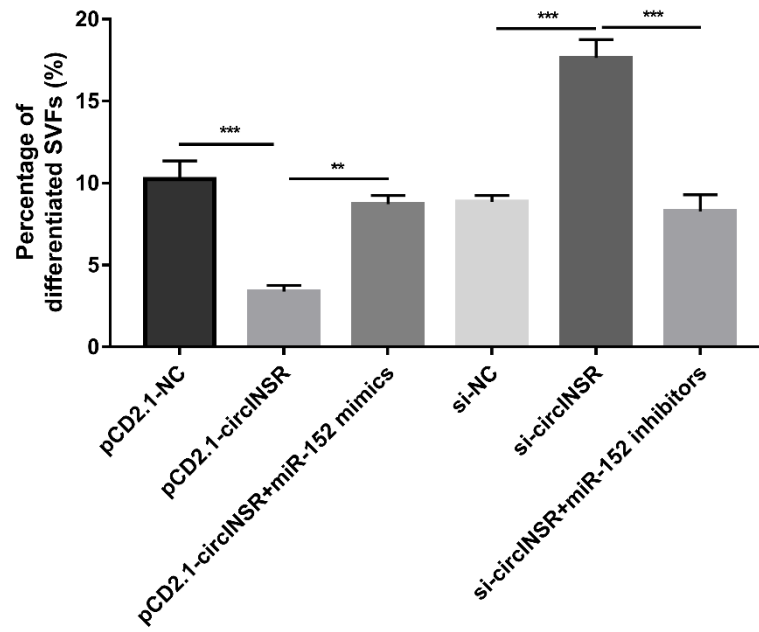

**Figure S4.** The percentage of differentiated SVFs containing lipid droplets that co-transfect with pCD2.1-circINSR and miR-152 mimics or si-circINSR and miR-152 inhibitors.
